# Supplementary material for: Contextual Social Cognition Impairments in Schizophrenia and Bipolar Disorder
Source: PLoS One. 2013 Mar 8;8(3):e57664. doi: 10.1371/journal.pone.0057664 (PMC3592887; doi:10.1371/journal.pone.0057664)
Supplement: File S1 — Generalized Linear Model Details. A description of the GLM procedure. (DOC) [file pone.0057664.s001.doc]

**S1 Generalized Linear Model Details**

A realization of a binomial variable Y ~ B(n,p), states how many times out of n an event with probability of occurrence p succeeded. In an experimental environment, a participant is presented with n trials, and individual answers are then classified into binomial format (correct, incorrect). As a result, we can create a model using a binomial outcome. However, the probability of answering properly depends on certain features and can vary among individuals. To account for this variability, the probability of success for each participant could be parameterized on other variables. The binomial logit framework allows for this feature, since it models the outcome of the test for each individual:

Y­­­i ~ B(n,pi), where pi = logit (Xi β),

Where Xi is a set of independent variables and β is the estimated parameter. The function logit maps real numbers to probabilities. The maximum likelihood estimation is achieved through Fisher’s method of scoring. The asymptotic properties of the estimator allow for significance tests on the parameters, calculating which parameter has an important influence on the response. The influence of the parameters on the response can be interpreted in terms of the odds of success, i.e.

pi/(1-pi) = exp(Xiβ) = exp(Xi0βi0+ Xi1βi1+…+ XiPβiP)

= exp(Xi0βi0) exp(Xi1βi1)…exp(XiPβiP)

An increment of 1 unit in the parameter Xi0 implies :

pi/(1-pi) = exp[(Xi0+1)βi0] exp(Xi1βi1)…exp(XiPβiP)

= exp(βi0) exp(Xi0 βi0) exp(Xi1βi1)…exp(XiPβiP)

A multiplication of the odds of success by a factor exp(βi0). Thus, if βi0>0 then the bigger Xi0, the greater the odds and consequently, the probability of success. If βi0<0, then the bigger Xi0, the lower the odds and consequently, the probability of success. This analysis can be performed with every parameter to analyze its influence on the probability of correctly answering a question.
